# Supplementary material for: Clinical and prognostic significance of small paroxysmal nocturnal hemoglobinuria clones in myelodysplastic syndrome and aplastic anemia
Source: PubMed Central journal article supplement (PMC8550969; doi:10.1038/s41375-021-01190-9), 2021-03-04
Supplement: 41375_2021_1190_MOESM1_ESM.pdf [file 41375_2021_1190_MOESM1_ESM.pdf]

Figure 1S

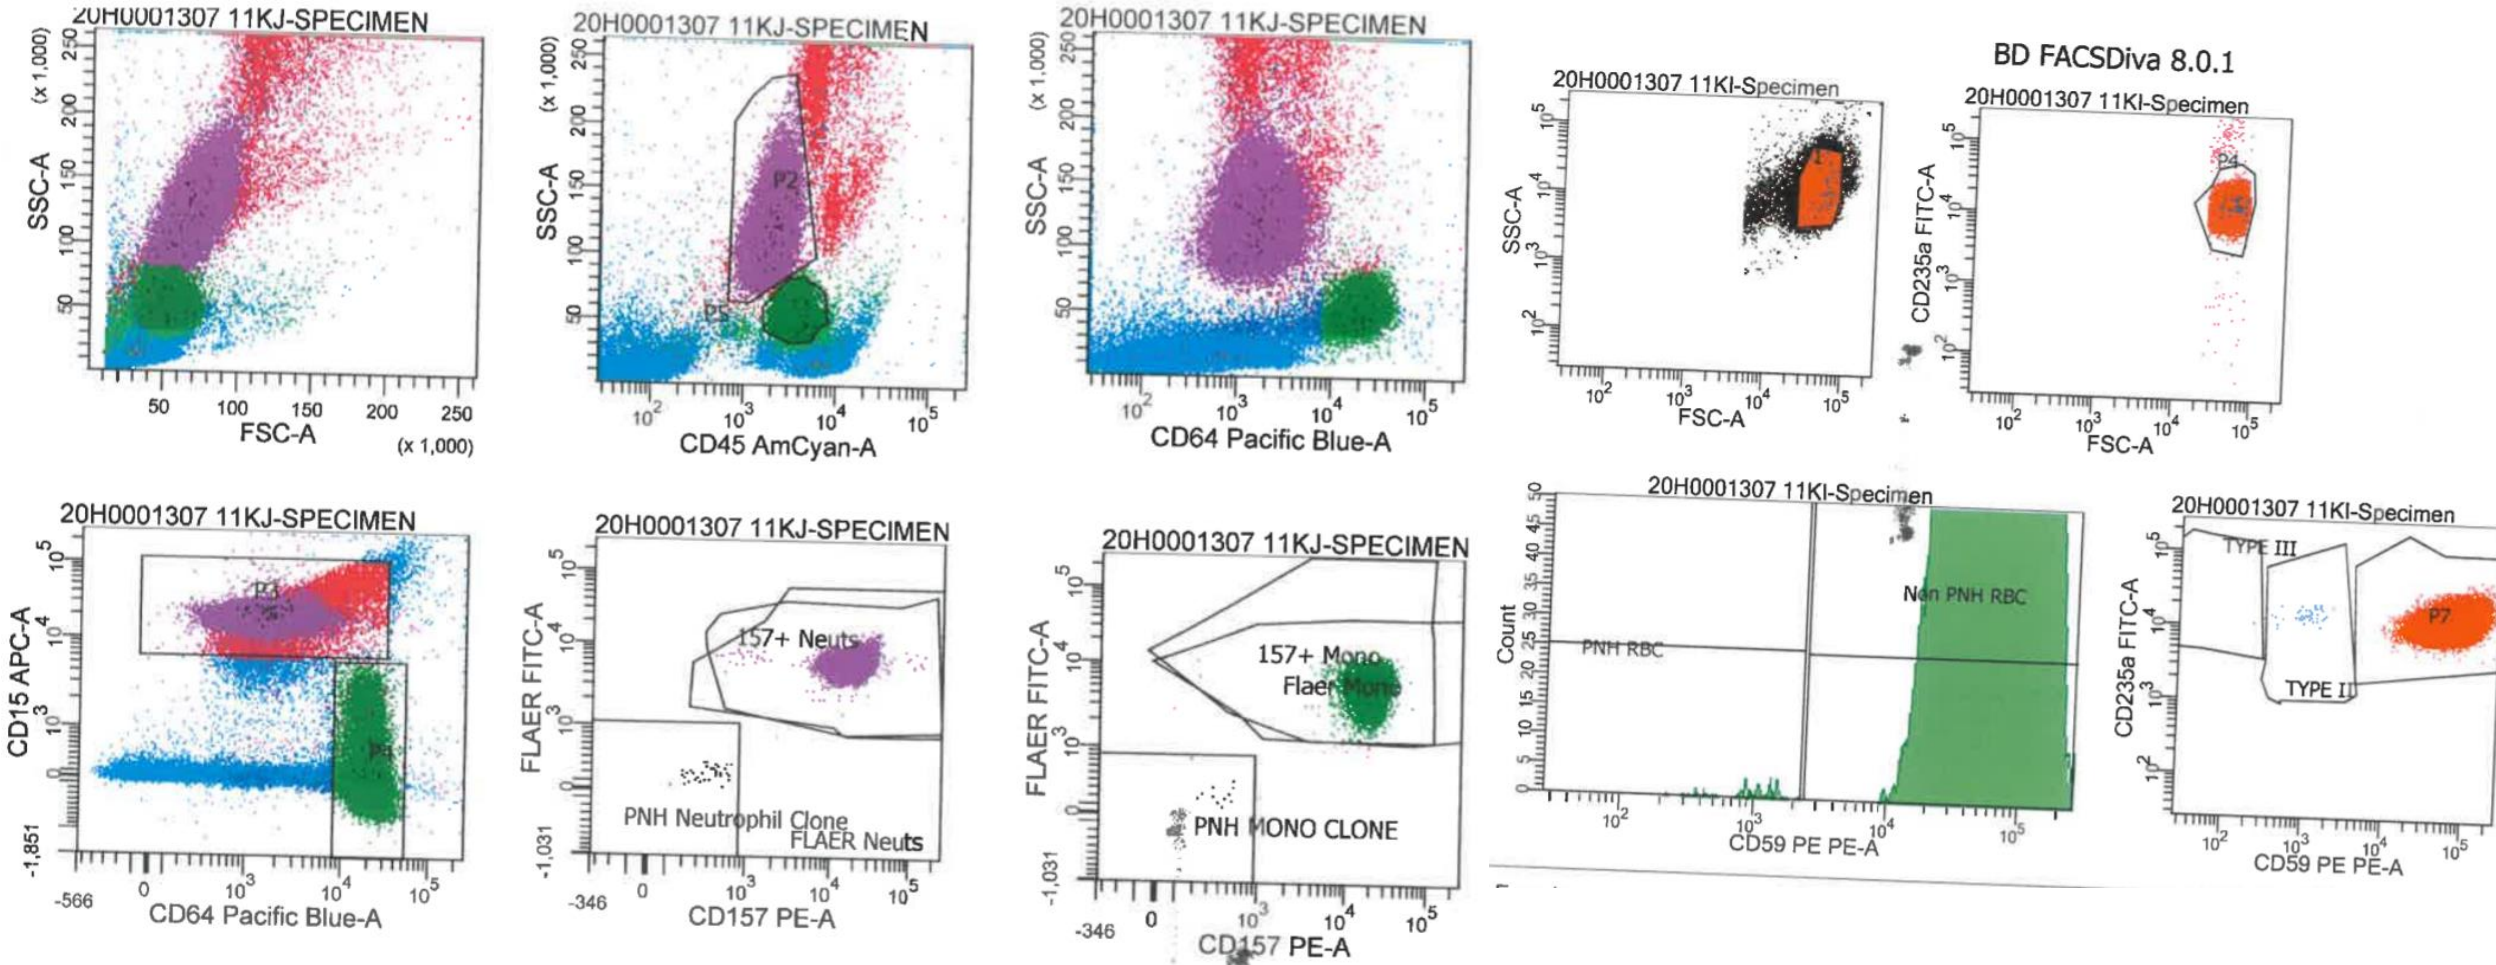

| Population           | %Parent |
|----------------------|---------|
| P3 AND P2            | 35.50   |
| PNH Neutrophil Clone | 0.09    |
| FLAER Neuts          | 99.90   |
| 157+ Neuts           | 99.90   |
| P4 AND P5            | 12.16   |
| PNH MONO CLONE       | 0.09    |
| Flaer Mono           | 99.83   |
| 157+ Mono            | 99.81   |

| Population  | #Events | %Parent |
|-------------|---------|---------|
| P4          | 93,812  | 99.85   |
| Non PNH RBC | 93,765  | 99.95   |
| PNH RBC     | 47      | 0.05    |
| TYPE III    | 2       | 0.00    |
| TYPE II     | 44      | 0.05    |
| P7          | 93,765  | 99.95   |

Figure 2S

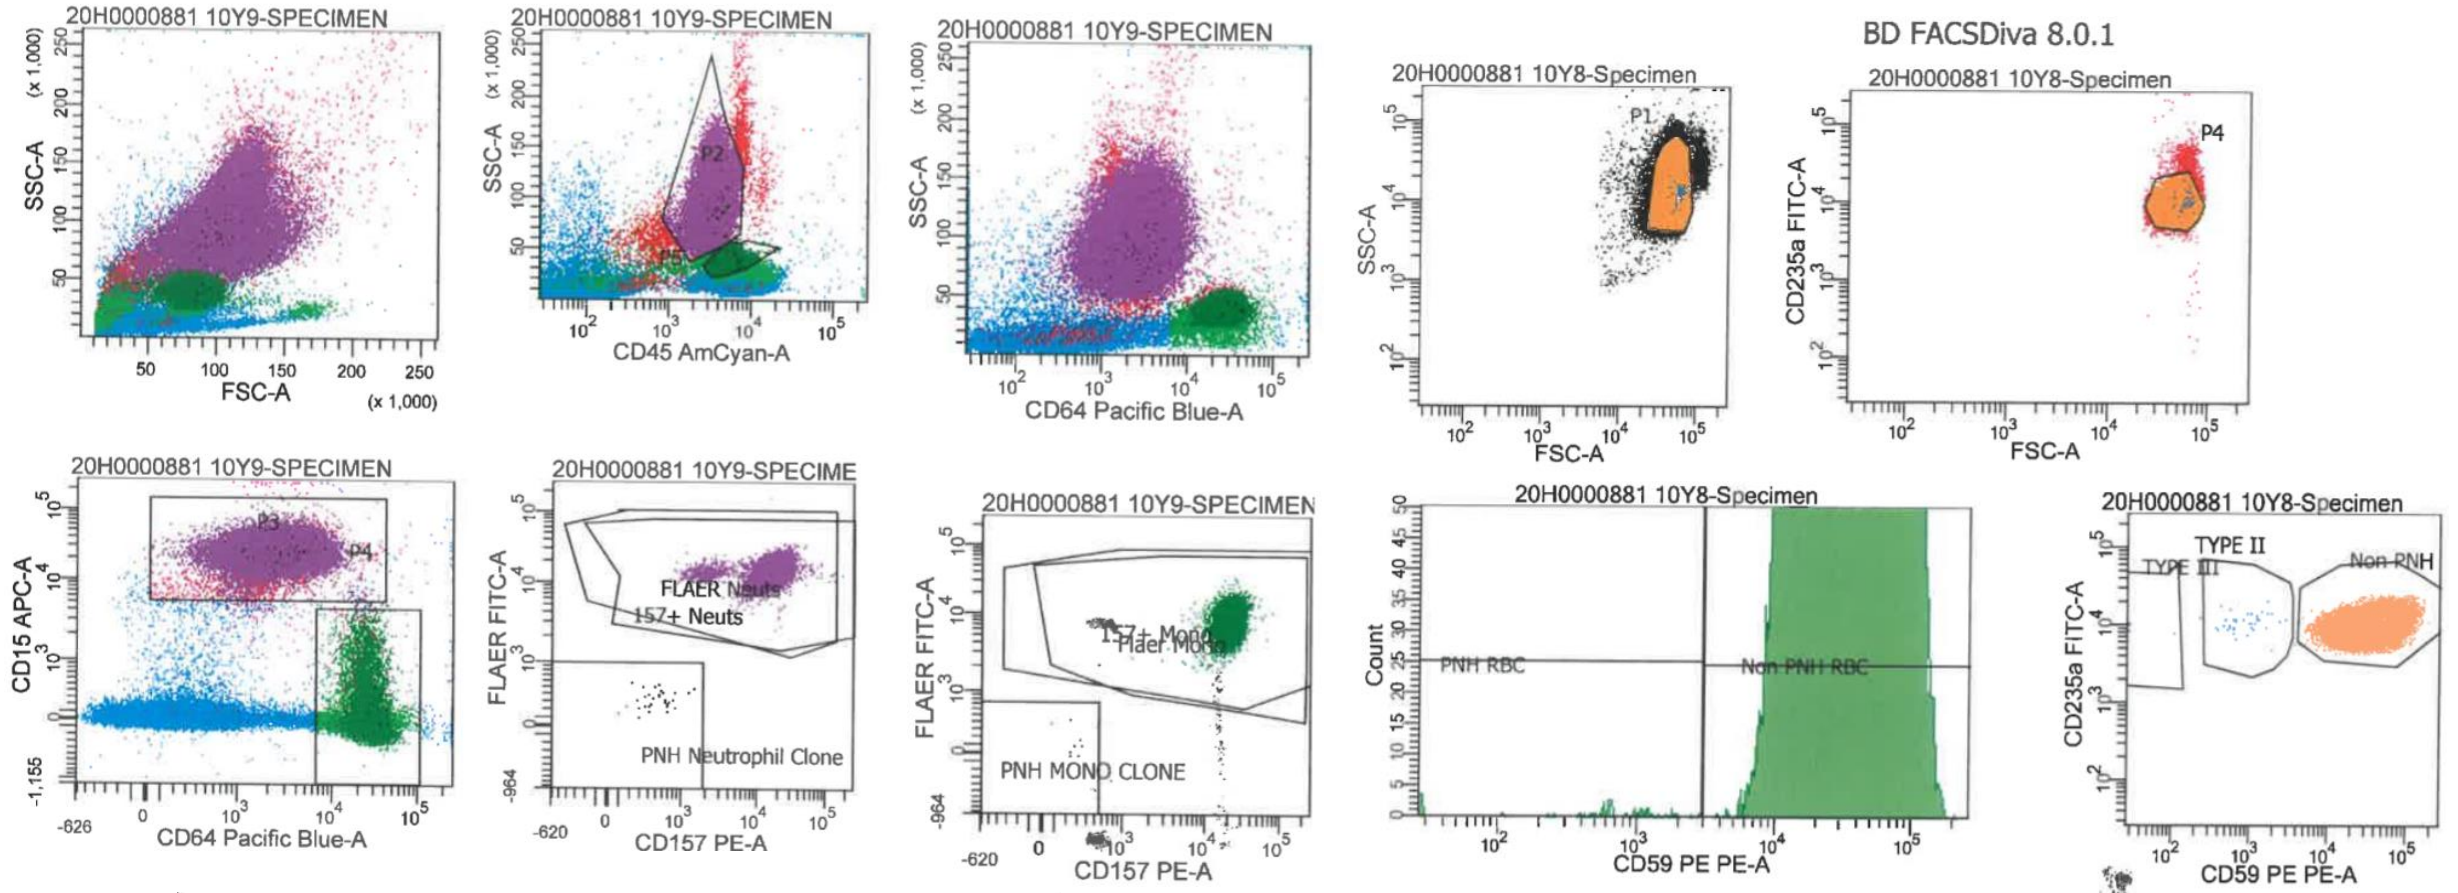

| Population           | %Parent |
|----------------------|---------|
| P3 AND P2            | 41.02   |
| PNH Neutrophil Clone | 0.06    |
| FLAER Neuts          | 99.94   |
| 157+ Neuts           | 99.94   |
| P4 AND P5            | 5.22    |
| PNH MONO CLONE       | 0.11    |
| Flaer Mono           | 99.88   |
| 157+ Mono            | 99.89   |

| Population  | #Events | %Parent |
|-------------|---------|---------|
| P4          | 111,002 | 98.96   |
| Non PNH RBC | 110,956 | 99.96   |
| PNH RBC     | 46      | 0.04    |
| TYPE III    | 5       | 0.00    |
| TYPE II     | 39      | 0.04    |
| Non PNH     | 110,954 | 99.96   |



### Figure 3S

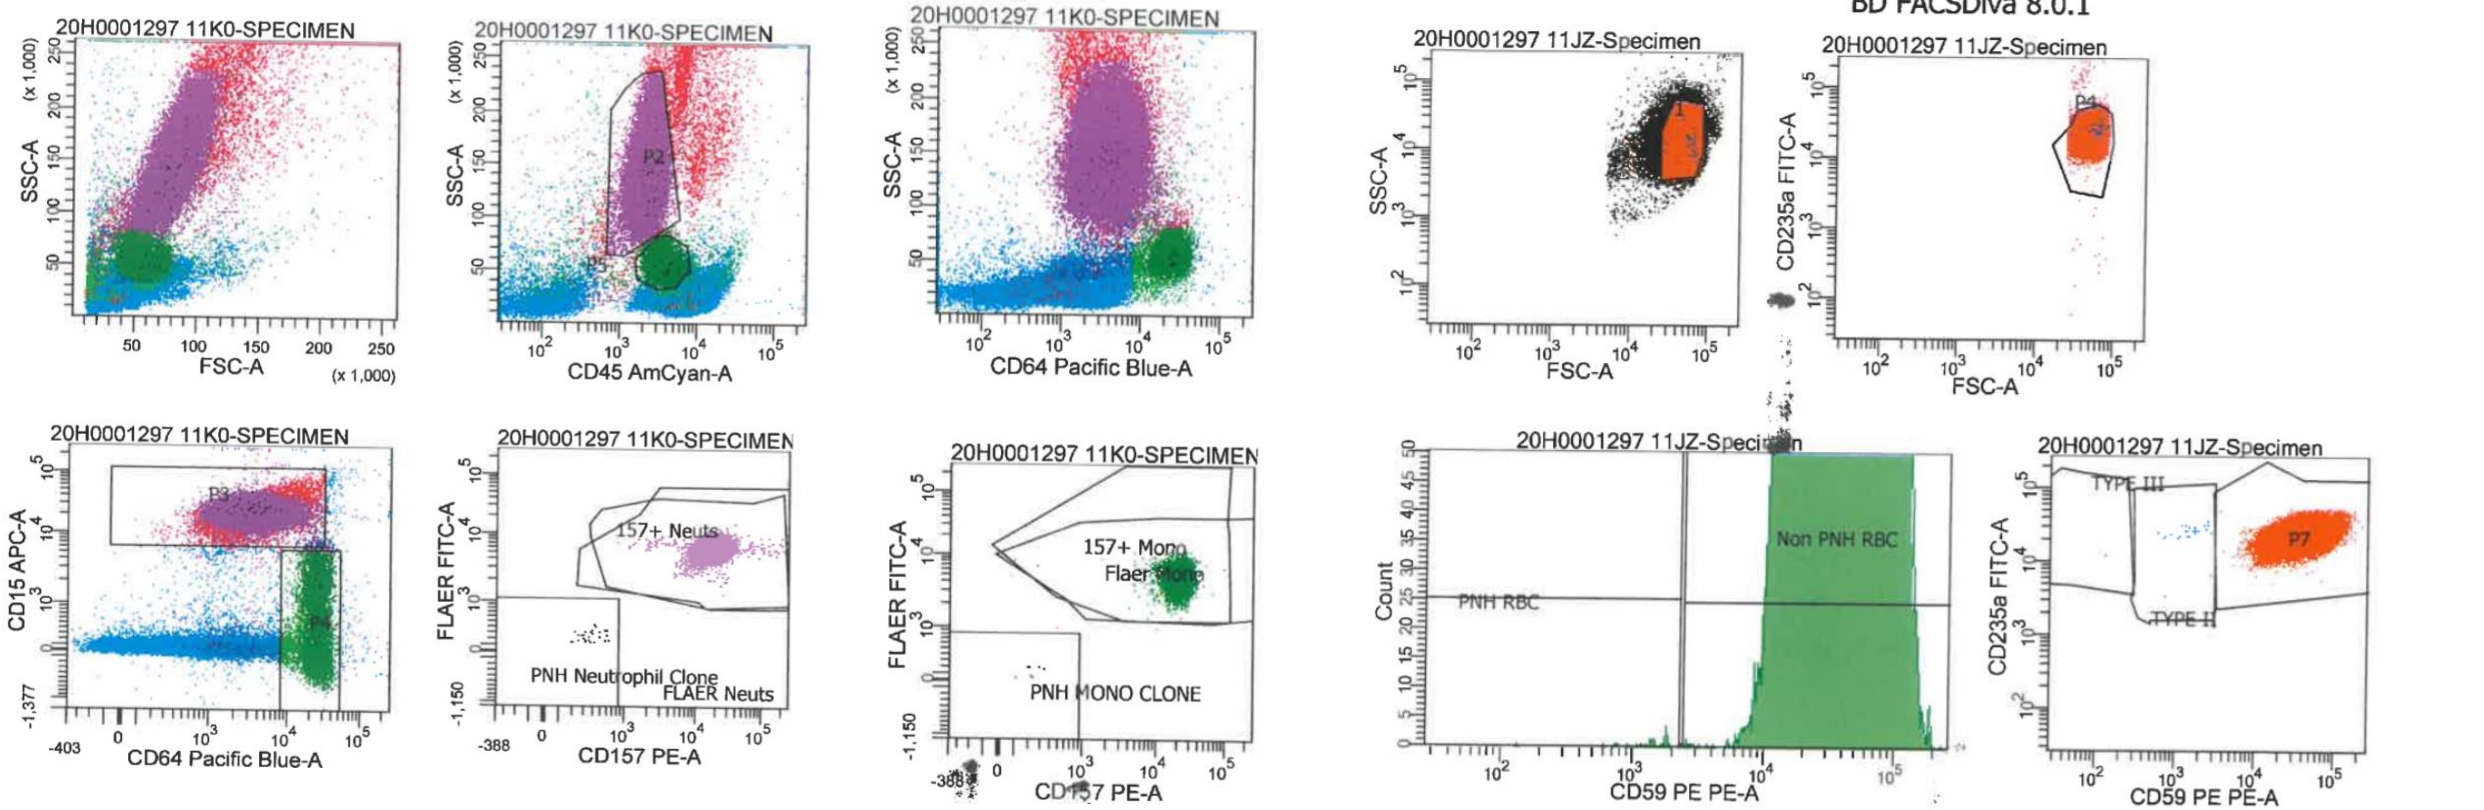

BD FACSDiva 8.0.1

| Population           | %Parent |
|----------------------|---------|
| P3 AND P2            | 43.43   |
| PNH Neutrophil Clone | 0.06    |
| FLAER Neuts          | 99.92   |
| 157+ Neuts           | 99.94   |
| P4 AND P5            | 4.60    |
| PNH MONO CLONE       | 0.13    |
| Flaer Mono           | 99.79   |
| 157+ Mono            | 99.77   |

| Population    | #Events | %Parent |
|---------------|---------|---------|
| P4            | 93,970  | 99.60   |
| ⊗ Non PNH RBC | 93,944  | 99.97   |
| ⊗ PNH RBC     | 24      | 0.03    |
| TYPE III      | 1       | 0.00    |
| TYPE II       | 29      | 0.03    |
| P7            | 93,940  | 99.97   |

Figure 4S

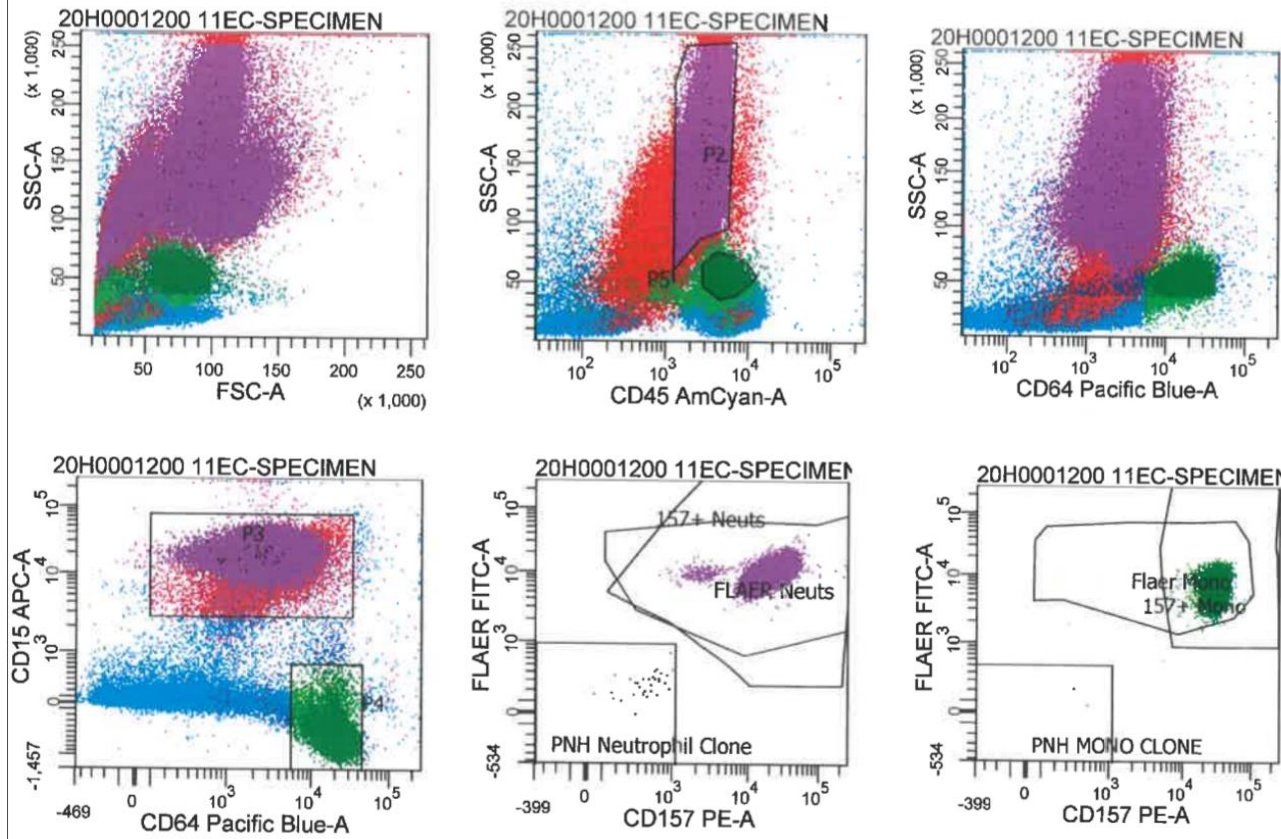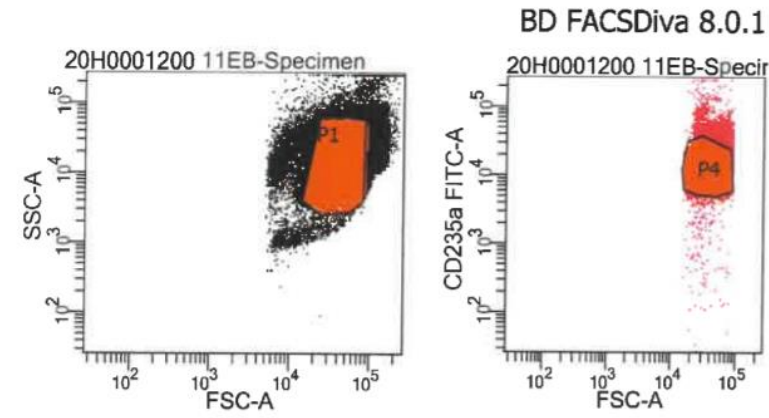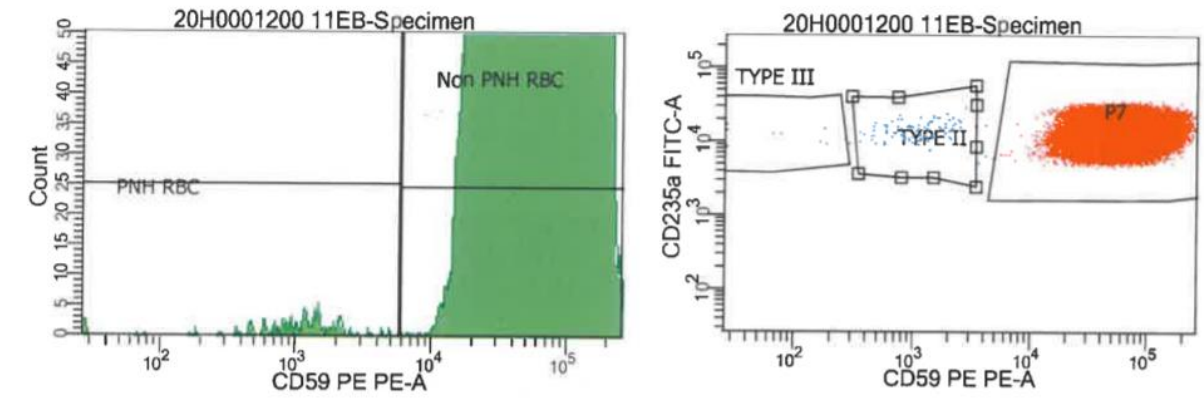

| Population           | %Parent |
|----------------------|---------|
| P3 AND P2            | 35.96   |
| PNH Neutrophil Clone | 0.04    |
| FLAER Neuts          | 99.96   |
| 157+ Neuts           | 99.96   |
| P4 AND P5            | 4.18    |
| PNH MONO CLONE       | 0.02    |
| Flaer Mono           | 99.89   |
| 157+ Mono            | 99.82   |

| Population  | #Events | %Parent |
|-------------|---------|---------|
| P4          | 462,159 | 95.30   |
| Non PNH RBC | 462,039 | 99.97   |
| PNH RBC     | 120     | 0.03    |
| TYPE III    | 10      | 0.00    |
| TYPE II     | 103     | 0.02    |
| P7          | 462,041 | 99.97   |



### Figure 5S

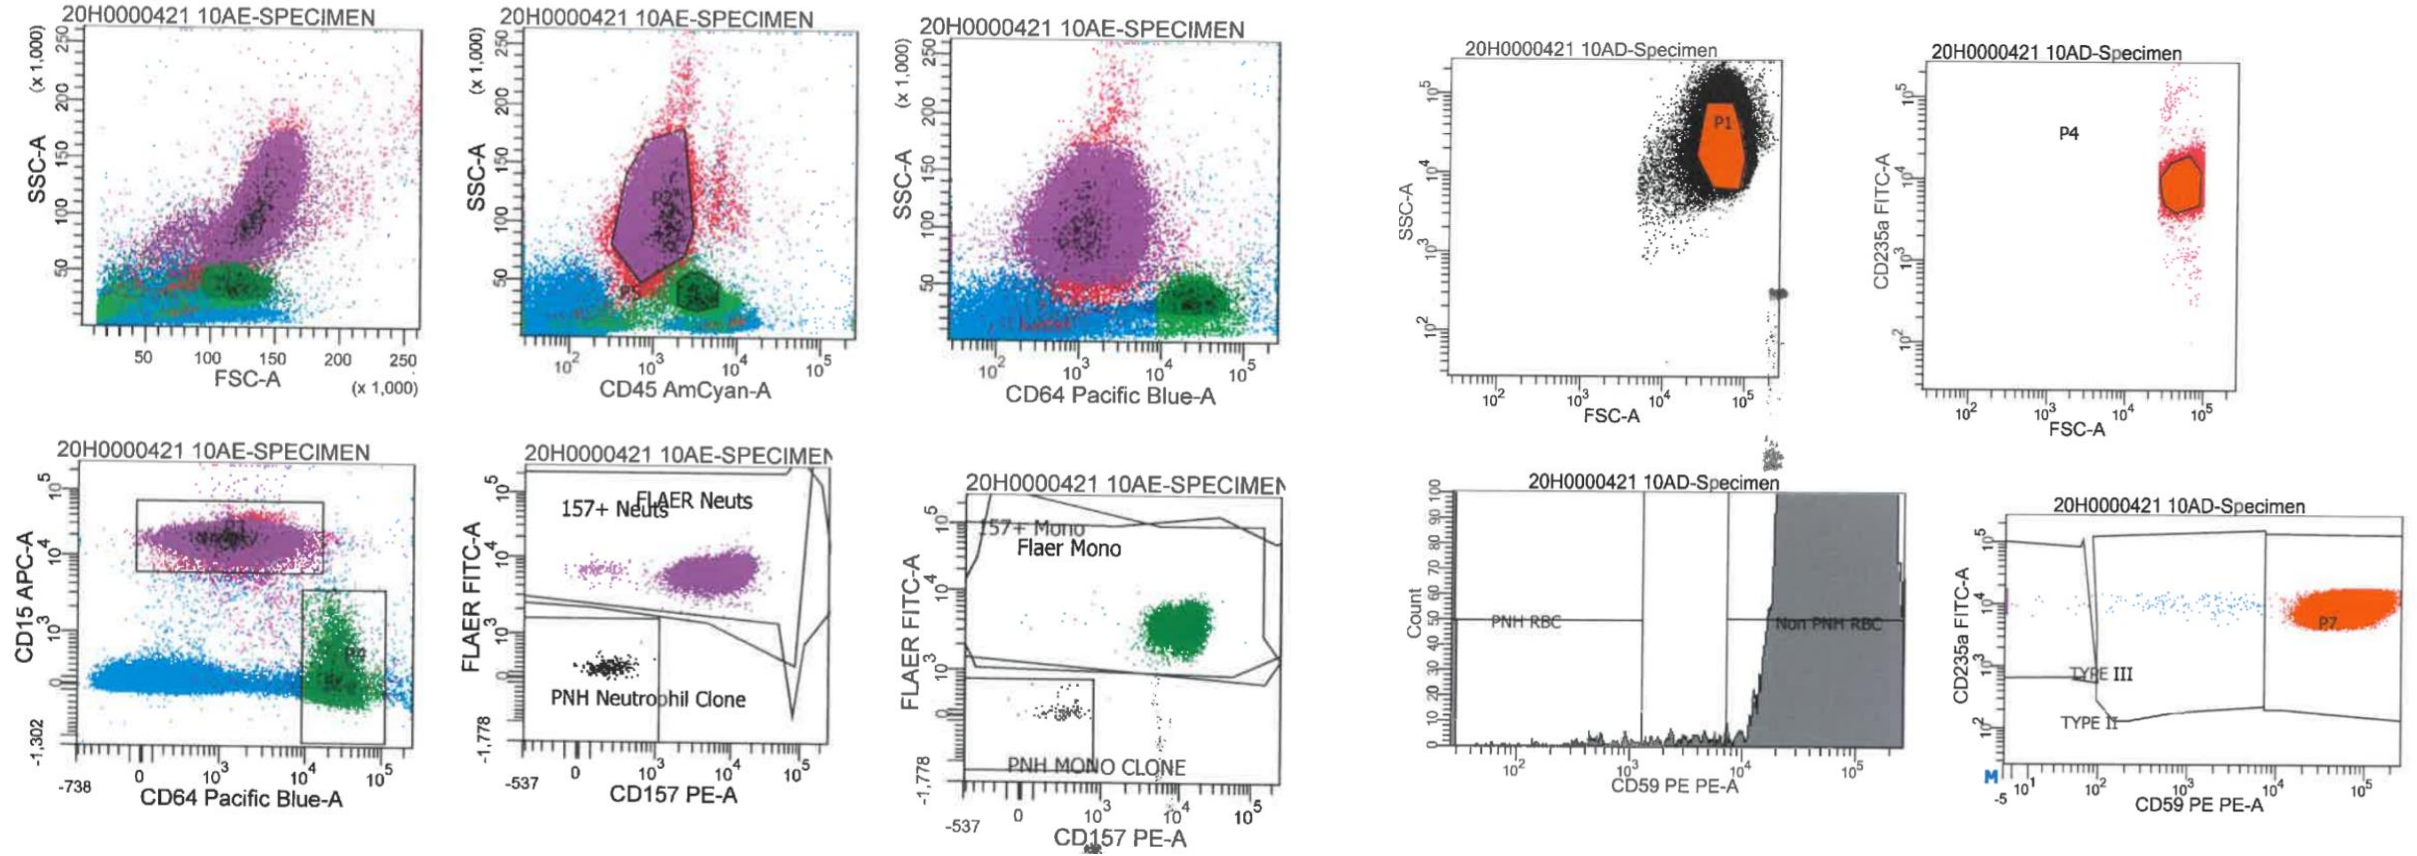

| Population           | %Parent |
|----------------------|---------|
| P3 AND P2            | 51.17   |
| PNH Neutrophil Clone | 0.21    |
| FLAER Neuts          | 99.79   |
| 157+ Neuts           | 99.78   |
| P4 AND P5            | 3.91    |
| PNH MONO CLONE       | 0.90    |
| Flaer Mono           | 99.08   |
| 157+ Mono            | 99.07   |

| Population  | #Events | %Parent |
|-------------|---------|---------|
| P4          | 89,637  | 86.80   |
| Non PNH RBC | 89,412  | 99.75   |
| PNH RBC     | 159     | 0.18    |
| TYPE III    | 98      | 0.11    |
| TYPE II     | 128     | 0.14    |
| P7          | 89,411  | 99.75   |

Figure 6S

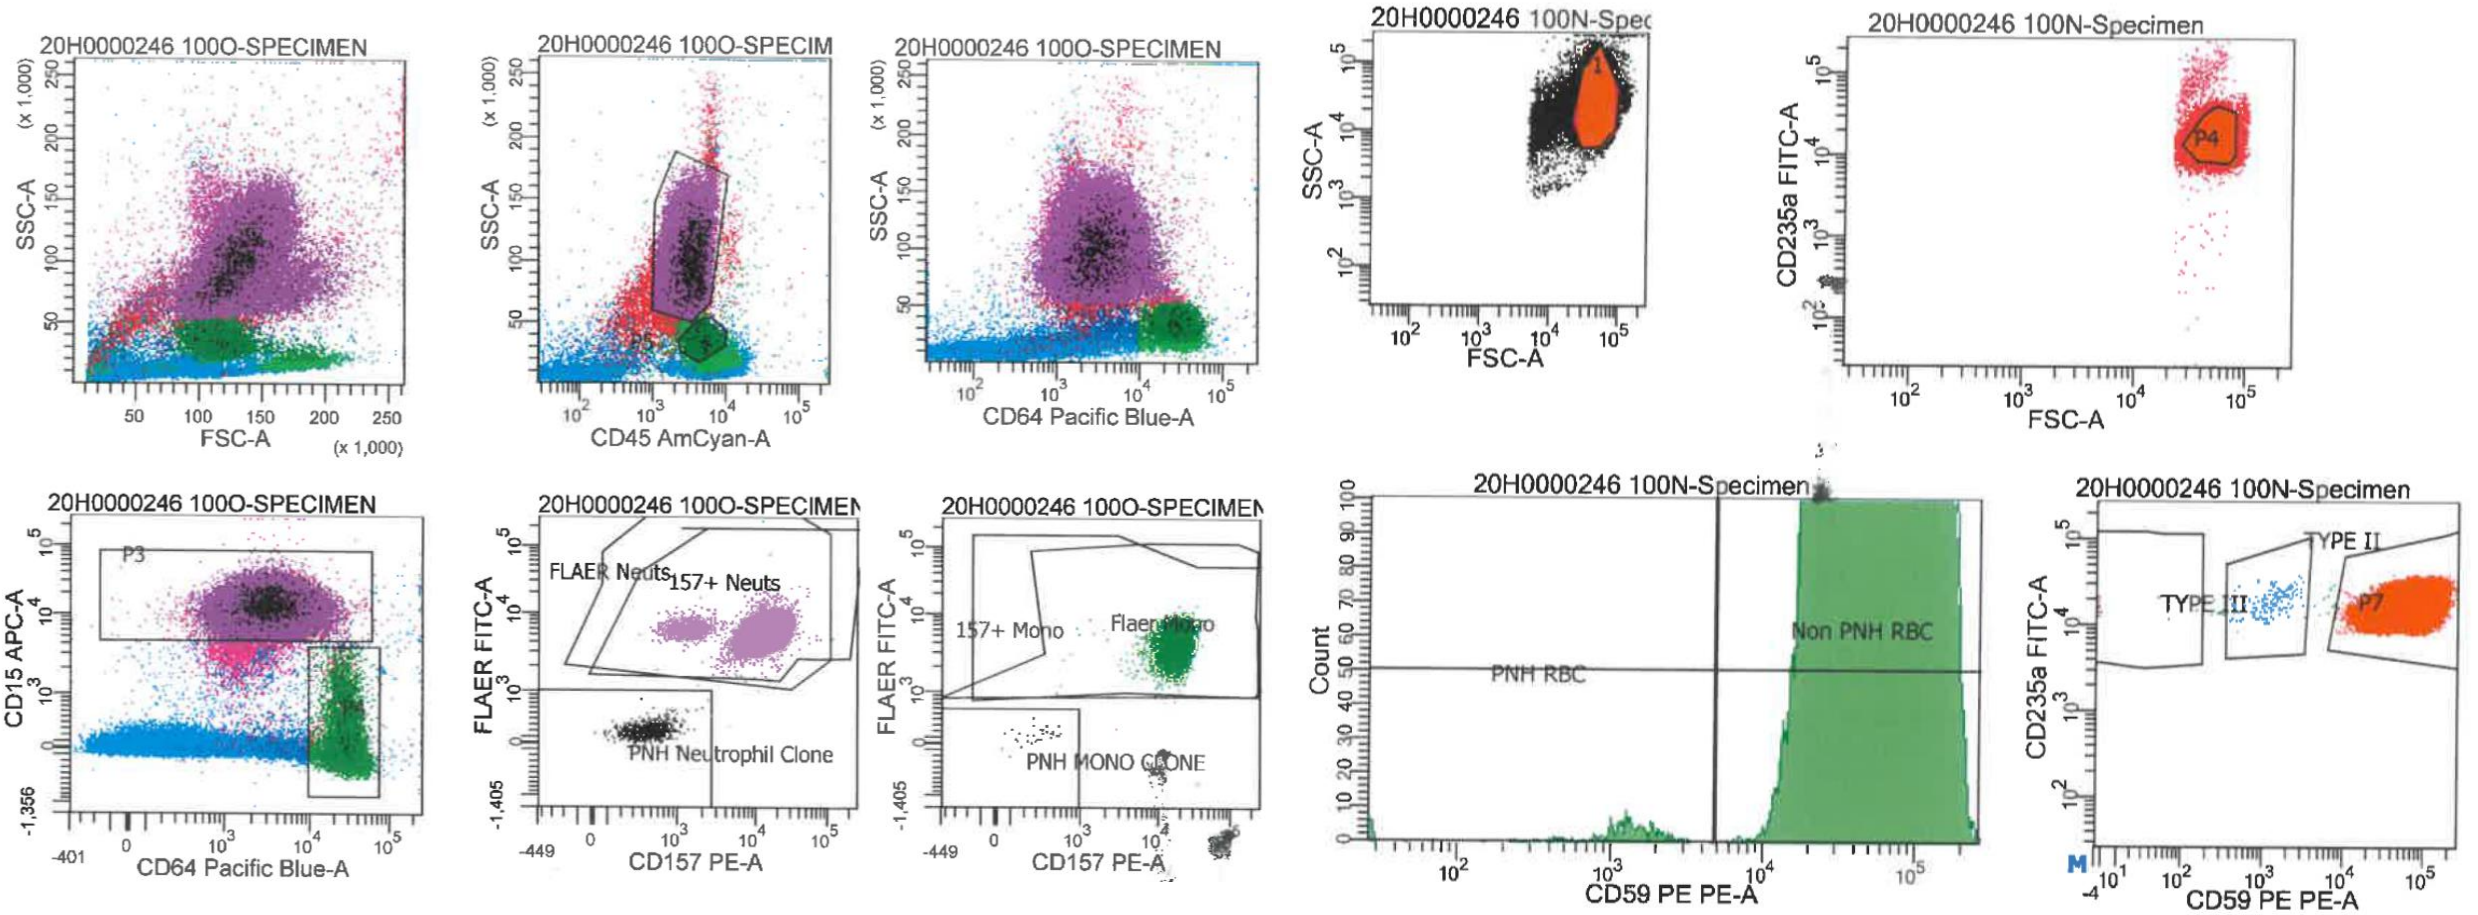

| Population           | %Parent |
|----------------------|---------|
| P3 AND P2            | 63.52   |
| PNH Neutrophil Clone | 0.48    |
| FLAER Neuts          | 99.51   |
| 157+ Neuts           | 99.51   |
| P4 AND P5            | 4.42    |
| PNH MONO CLONE       | 0.35    |
| Flaer Mono           | 99.56   |
| 157+ Mono            | 99.60   |

| Population  | #Events <sup>10</sup> | %Parent |
|-------------|-----------------------|---------|
| P4          | 129,128               | 93.15   |
| Non PNH RBC | 128,938               | 99.85   |
| PNH RBC     | 190                   | 0.15    |
| TYPE III    | 10                    | 0.01    |
| TYPE II     | 170                   | 0.13    |
| P7          | 128,928               | 99.85   |



Figure 7S

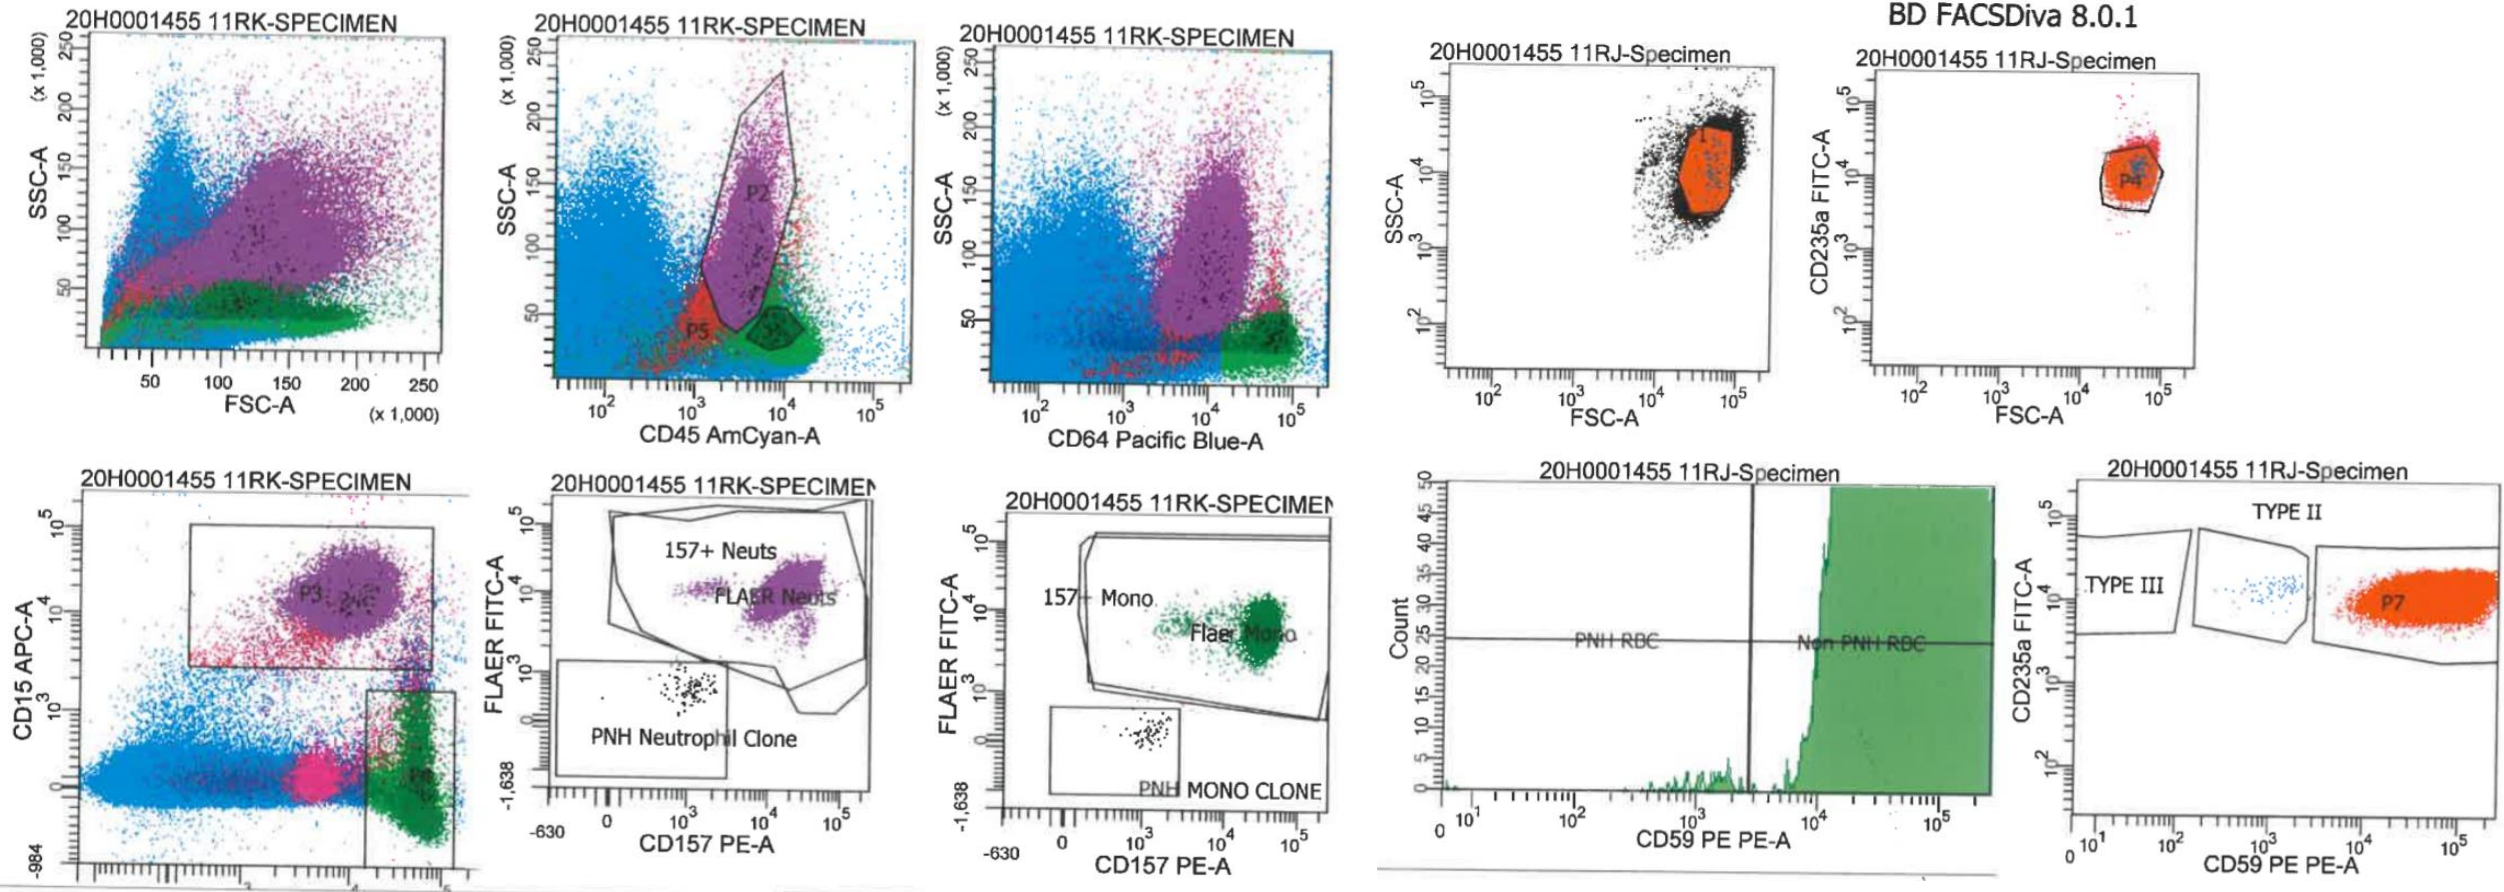

- Population
- P3 AND P2
  - PNH Neutrophil Clone
  - FLAER Neuts
  - 157+ Neuts
  - P4 AND P5
  - PNH MONO CLONE
  - Flaer Mono
  - 157+ Mono

| Parent |
|--------|
| 5.36   |
| 0.13   |
| 99.86  |
| 99.86  |
| 0.72   |
| 0.63   |
| 99.31  |
| 99.31  |

- Population
- P4
  - Non PNH RBC
  - PNH RBC
  - TYPE III
  - TYPE II
  - P7

|         |
|---------|
| 114,404 |
| 77      |
| 3       |
| 74      |
| 114,402 |

| %Parent |
|---------|
| 99.20   |
| 99.93   |
| 0.07    |
| 0.00    |
| 0.06    |
| 99.93   |

# Figure 8S

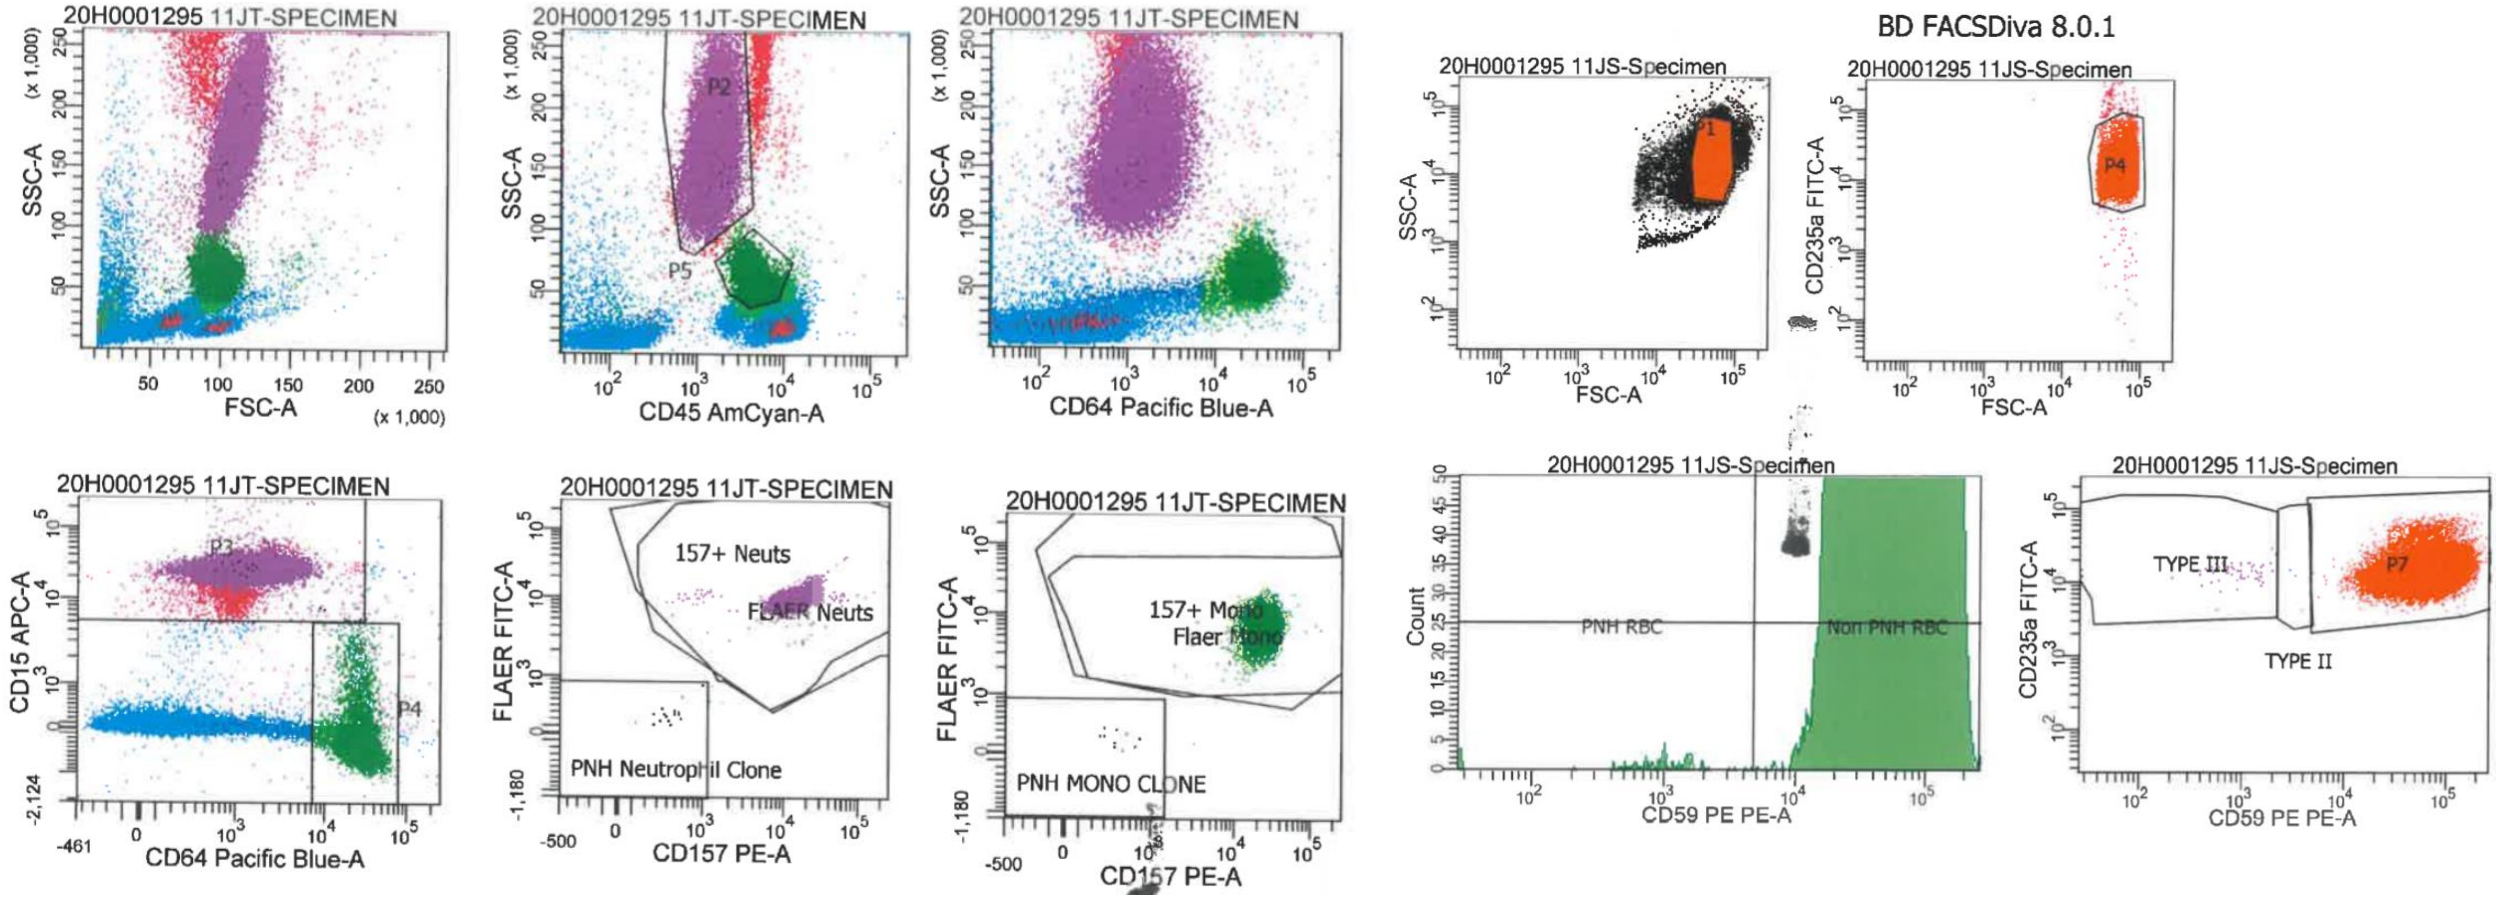

| Population           | %Parent |
|----------------------|---------|
| P3 AND P2            | 33.86   |
| PNH Neutrophil Clone | 0.06    |
| FLAER Neuts          | 99.93   |
| 157+ Neuts           | 99.93   |
| P4 AND P5            | 8.09    |
| PNH MONO CLONE       | 0.15    |
| Flaer Mono           | 99.84   |
| 157+ Mono            | 99.82   |

| Population  | #Events | %Parent |
|-------------|---------|---------|
| P4          | 131,095 | 99.86   |
| Non PNH RBC | 131,024 | 99.95   |
| PNH RBC     | 71      | 0.05    |
| TYPE III    | 66      | 0.05    |
| TYPE II     | 4       | 0.00    |
| P7          | 131,024 | 99.95   |



### Figure 9S

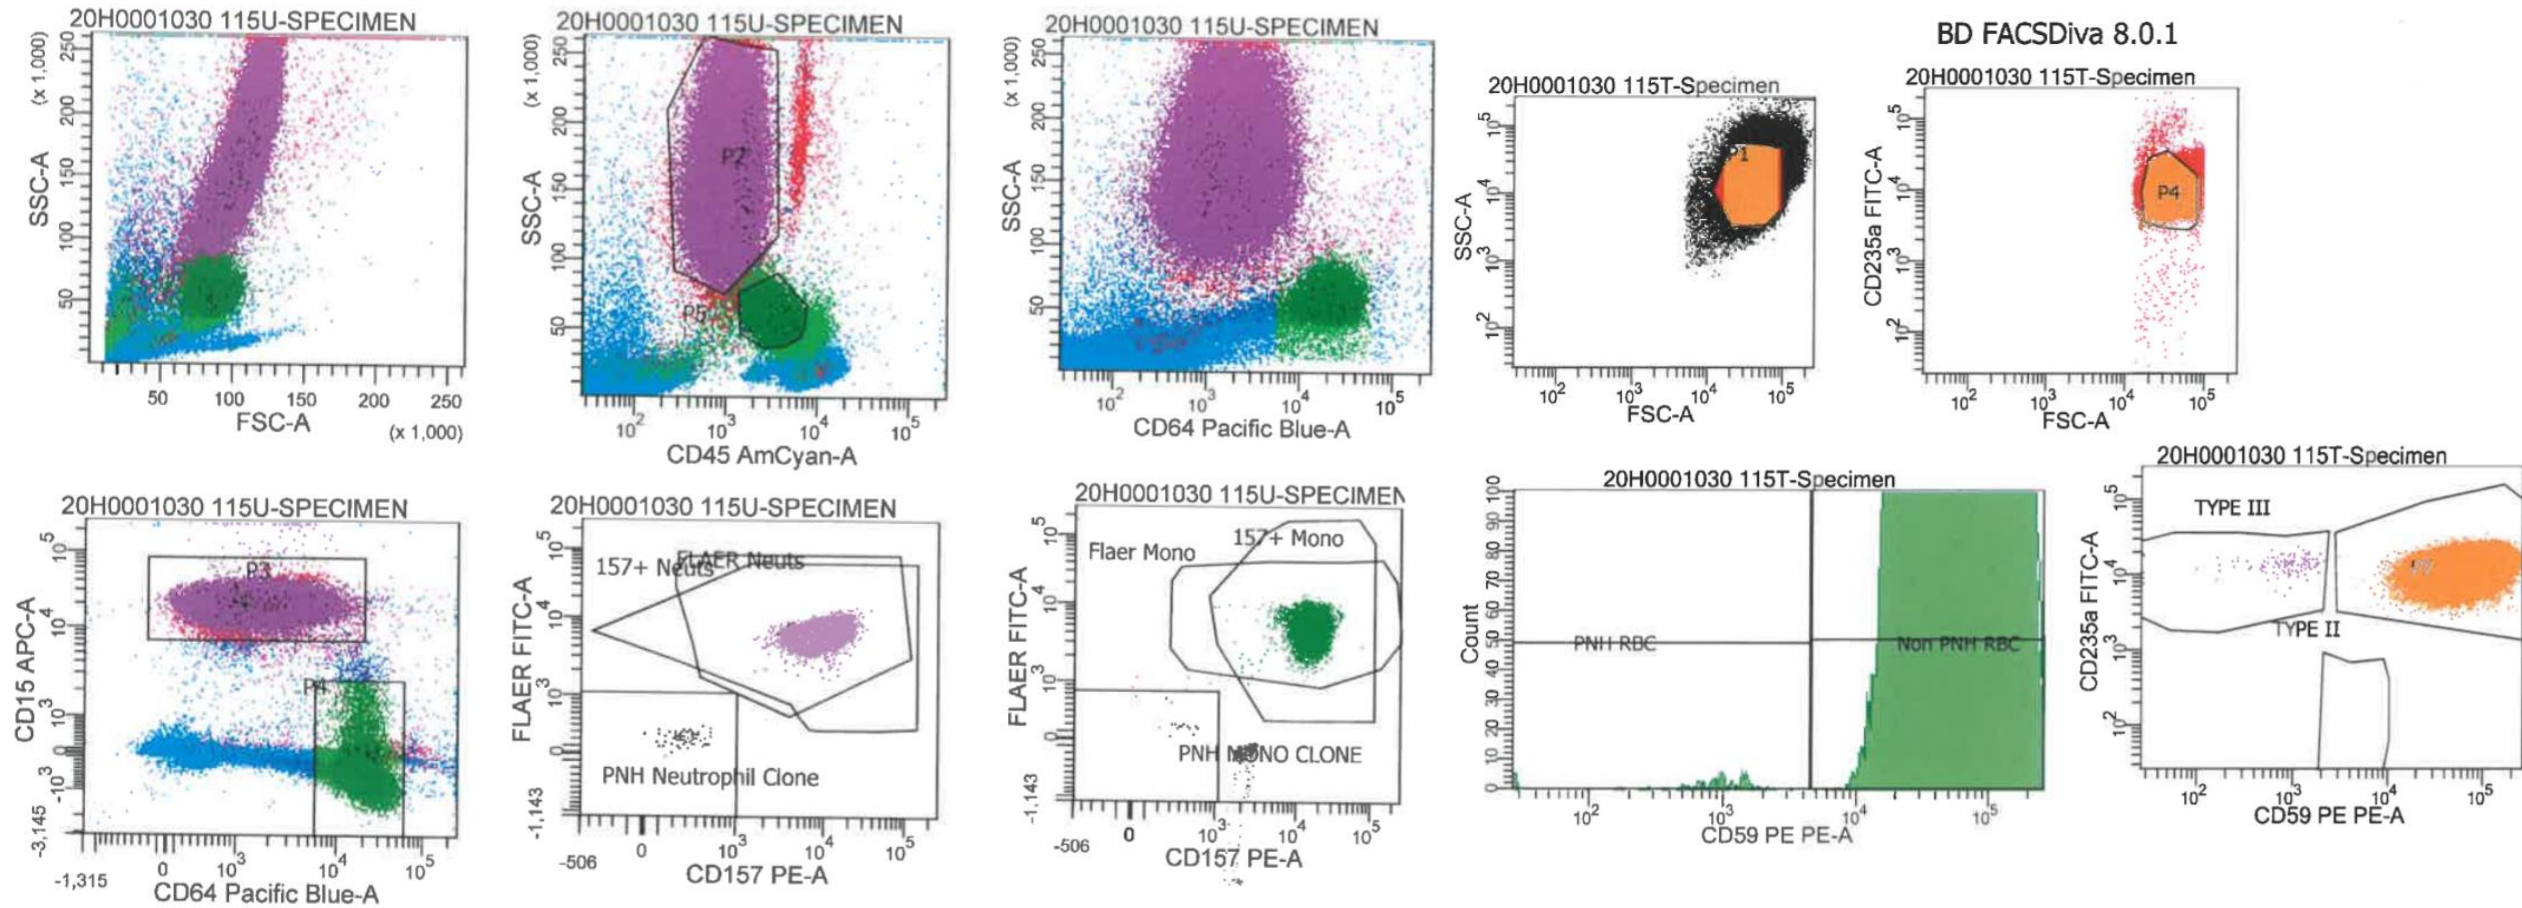

| Population           | %Parent |
|----------------------|---------|
| P3 AND P2            | 47.04   |
| PNH Neutrophil Clone | 0.08    |
| FLAER Neuts          | 99.92   |
| 157+ Neuts           | 99.92   |
| P4 AND P5            | 5.41    |
| PNH MONO CLONE       | 0.15    |
| Flaer Mono           | 99.76   |
| 157+ Mono            | 99.78   |

| Population  | #Events | %Parent |
|-------------|---------|---------|
| P4          | 442,048 | 76.56   |
| Non PNH RBC | 441,915 | 99.97   |
| PNH RBC     | 132     | 0.03    |
| TYPE III    | 130     | 0.03    |
| TYPE II     | 0       | 0.00    |
| P7          | 441,917 | 99.97   |





Figure 11S

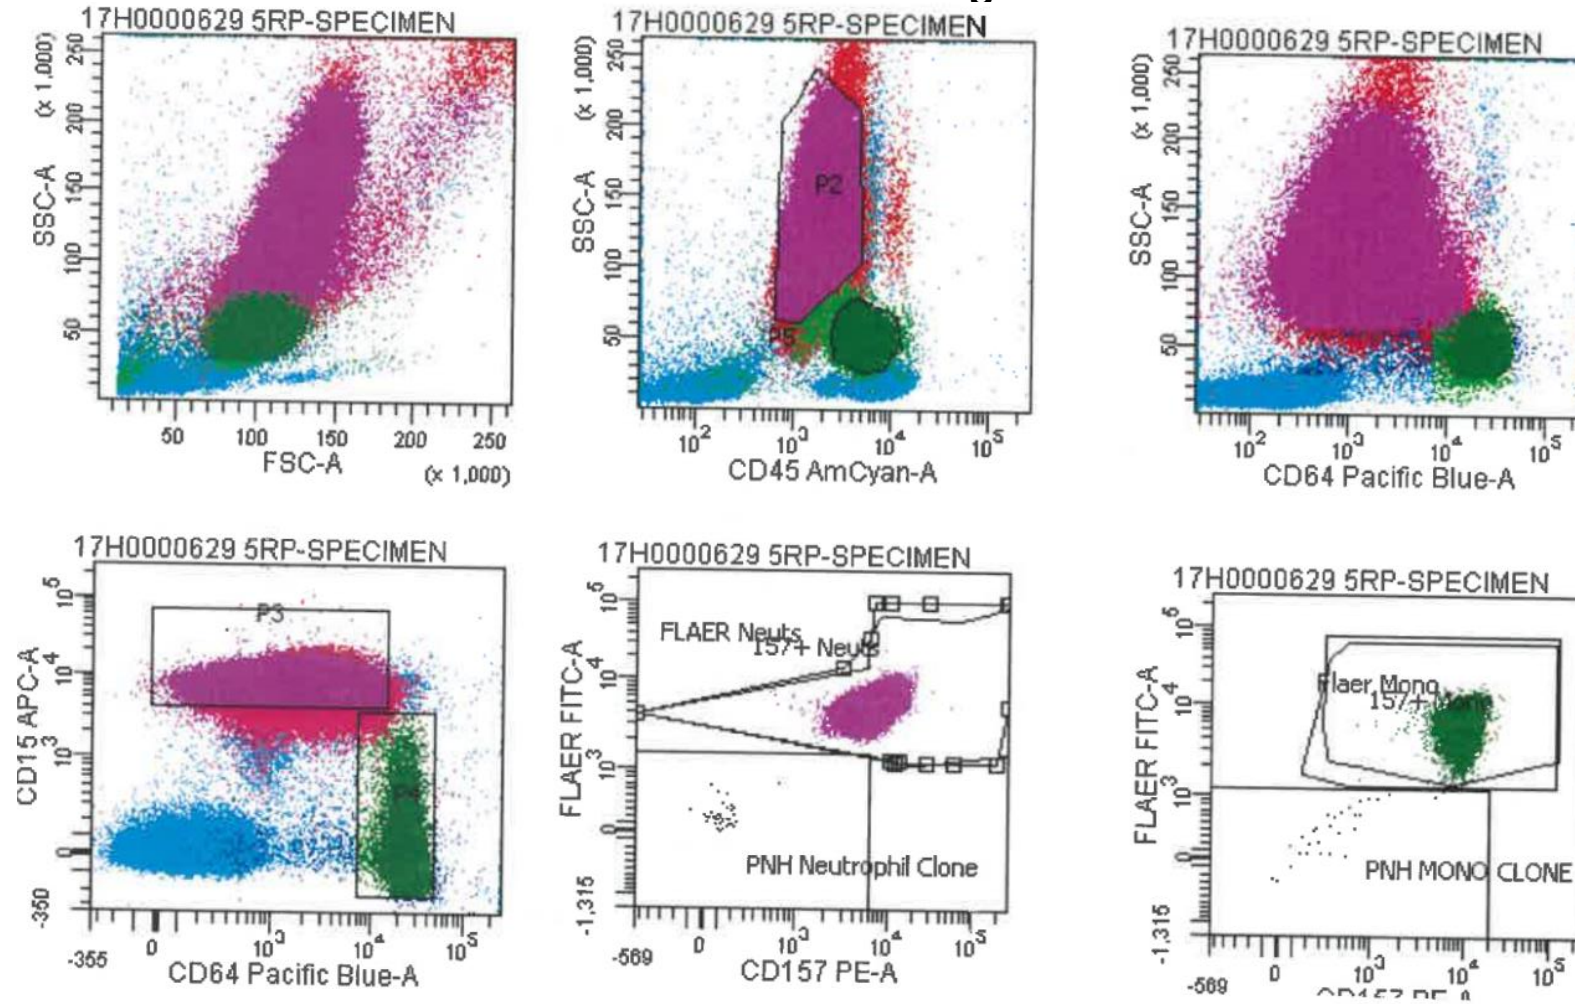

| Population           | #Events | %Parent | %Total |
|----------------------|---------|---------|--------|
| All Events           | 266,765 | ####    | 100.0  |
| P3                   | 191,053 | 71.6    | 71.6   |
| P4                   | 16,554  | 6.2     | 6.2    |
| P5                   | 14,679  | 5.5     | 5.5    |
| P2                   | 193,633 | 72.6    | 72.6   |
| P3 AND P2            | 182,445 | 68.4    | 68.4   |
| PNH Neutrophil Clone | 40      | 0.0     | 0.0    |
| FLAER Neuts          | 182,399 | 100.0   | 68.4   |
| 157+ Neuts           | 182,400 | 100.0   | 68.4   |
| P4 AND P5            | 13,792  | 5.2     | 5.2    |
| PNH MONO CLONE       | 29      | 0.2     | 0.0    |
| Flaer Mono           | 13,752  | 99.7    | 5.2    |
| 157+ Mono            | 13,759  | 99.8    | 5.2    |

| Population           | %Parent |
|----------------------|---------|
| P3 AND P2            | 68.39   |
| PNH Neutrophil Clone | 0.02    |
| FLAER Neuts          | 99.97   |
| 157+ Neuts           | 99.98   |
| P4 AND P5            | 5.17    |
| PNH MONO CLONE       | 0.21    |
| Flaer Mono           | 99.71   |
| 157+ Mono            | 99.76   |
